# Supplementary material
Source: publisher figshare collection journal article supplement (https://karger.figshare.com/ndownloader/files/30725990)
Supplement: Supplementary file 1 [file 30725990]

| Num-  ber | Age | *Gestational ages (week+day)*  Supplementary Table 1: Summary of healthy controls with bronchial angles measurements | Echocardi-  ographer 1 | First α angle(°) | Second α angle(°) | Third α angle(°) | Means of α angle(°) | First β angle(°) | Second β angle(°) | Third β angle(°) | Means of β angle(°) | ratio of α/β angle | Echocardio-  grapher 2 | First α angle(°) | Second α angle(°) | Third α angle(°) | Means of α angle(°) | First β angle(°) | Second β angle(°) | Third β angle(°) | Means of  β angle(°) |
| --- | --- | --- | --- | --- | --- | --- | --- | --- | --- | --- | --- | --- | --- | --- | --- | --- | --- | --- | --- | --- | --- |
| 1 | 26 | *24+1* | WX | 147 | 146 | 150 | 148 | 166 | 167 | 168 | 166 | 0.89 | CS | 149 | 145 | 151 | 148 | 174 | 170 | 173 | 172 |
| 2 | 27 | *22+0* | WX | 149 | 153 | 151 | 151 | 168 | 169 | 169 | 168 | 0.90 | CS | 152 | 151 | 151 | 151 | 173 | 171 | 172 | 172 |
| 3 | 32 | *25+2* | WX | 156 | 153 | 154 | 154 | 168 | 172 | 171 | 170 | 0.91 | CS | 155 | 150 | 150 | 152 | 160 | 161 | 161 | 161 |
| 4 | 33 | *24+1* | WX | 145 | 143 | 143 | 144 | 150 | 147 | 149 | 148 | 0.97 | CS | 147 | 145 | 140 | 144 | 147 | 147 | 145 | 146 |
| 5 | 28 | *23+6* | WX | 151 | 148 | 150 | 150 | 176 | 173 | 172 | 174 | 0.86 | CS | 153 | 155 | 150 | 153 | 165 | 168 | 168 | 167 |
| 6 | 25 | *23+6* | WX | 150 | 153 | 151 | 151 | 173 | 172 | 173 | 172 | 0.88 | CS | 154 | 155 | 153 | 154 | 173 | 171 | 172 | 172 |
| 7 | 26 | *23+6* | WX | 145 | 148 | 149 | 147 | 164 | 162 | 161 | 163 | 0.90 | CS | 152 | 152 | 150 | 151 | 164 | 158 | 162 | 161 |
| 8 | 26 | *25+2* | WX | 136 | 143 | 139 | 139 | 175 | 171 | 172 | 173 | 0.80 | CS | 141 | 143 | 142 | 142 | 169 | 170 | 173 | 171 |
| 9 | 27 | *23+5* | WX | 155 | 150 | 148 | 151 | 174 | 172 | 176 | 173 | 0.87 | CS | 152 | 147 | 148 | 149 | 169 | 168 | 168 | 168 |
| 10 | 28 | *25+2* | WX | 155 | 152 | 151 | 153 | 166 | 165 | 166 | 165 | 0.93 | CS | 149 | 147 | 151 | 149 | 171 | 167 | 171 | 169 |
| 11 | 30 | *25+0* | WX | 151 | 153 | 151 | 152 | 159 | 157 | 159 | 158 | 0.96 | CS | 156 | 156 | 158 | 157 | 157 | 157 | 160 | 158 |
| 12 | 24 | *24+5* | WX | 142 | 145 | 144 | 144 | 156 | 159 | 160 | 157 | 0.92 | CS | 144 | 145 | 147 | 145 | 158 | 155 | 157 | 157 |
| 13 | 23 | *25+2* | WX | 146 | 141 | 142 | 143 | 158 | 156 | 156 | 157 | 0.91 | CS | 144 | 141 | 144 | 143 | 155 | 153 | 159 | 156 |
| 14 | 25 | *22+2* | WX | 149 | 145 | 144 | 146 | 161 | 162 | 164 | 162 | 0.90 | CS | 142 | 144 | 145 | 144 | 163 | 164 | 159 | 162 |
| 15 | 24 | *25+2* | WX | 149 | 145 | 145 | 146 | 172 | 172 | 170 | 172 | 0.85 | CS | 148 | 146 | 149 | 148 | 173 | 173 | 170 | 172 |
| 16 | 26 | *23+5* | WX | 149 | 154 | 151 | 151 | 161 | 164 | 164 | 163 | 0.93 | CS | 149 | 153 | 149 | 150 | 158 | 160 | 162 | 160 |
| 17 | 27 | *24+2* | WX | 151 | 150 | 147 | 149 | 170 | 173 | 169 | 172 | 0.87 | CS | 152 | 155 | 150 | 152 | 171 | 169 | 168 | 170 |
| 18 | 28 | *24+2* | WX | 149 | 146 | 146 | 147 | 167 | 170 | 169 | 169 | 0.87 | CS | 152 | 147 | 148 | 149 | 171 | 173 | 169 | 171 |
| 19 | 29 | *24+2* | WX | 141 | 146 | 144 | 144 | 160 | 161 | 161 | 160 | 0.90 | CS | 143 | 144 | 142 | 143 | 163 | 162 | 162 | 162 |
| 20 | 26 | *26+0* | WX | 158 | 156 | 153 | 156 | 173 | 170 | 169 | 171 | 0.91 | CS | 156 | 158 | 156 | 157 | 173 | 172 | 171 | 172 |
| 21 | 25 | *26+4* | WX | 153 | 156 | 155 | 155 | 170 | 172 | 168 | 171 | 0.91 | CS | 157 | 156 | 156 | 156 | 162 | 158 | 164 | 162 |
| 22 | 25 | *25+3* | WX | 150 | 148 | 149 | 149 | 170 | 170 | 166 | 170 | 0.88 | CS | 151 | 149 | 151 | 150 | 170 | 169 | 168 | 169 |
| 23 | 26 | *24+4* | WX | 155 | 159 | 156 | 157 | 172 | 172 | 174 | 172 | 0.91 | CS | 155 | 156 | 155 | 155 | 173 | 174 | 174 | 174 |
| 24 | 25 | *31+3* | WX | 145 | 147 | 146 | 146 | 162 | 157 | 159 | 159 | 0.92 | CS | 142 | 142 | 147 | 144 | 151 | 160 | 160 | 157 |
| 25 | 27 | *26+3* | WX | 162 | 158 | 159 | 160 | 171 | 172 | 168 | 171 | 0.94 | CS | 156 | 156 | 158 | 157 | 169 | 171 | 170 | 170 |
| 26 | 24 | *24+2* | WX | 142 | 143 | 145 | 143 | 162 | 164 | 166 | 163 | 0.88 | CS | 145 | 142 | 145 | 144 | 170 | 170 | 168 | 170 |
| 27 | 23 | *25+2* | WX | 141 | 144 | 143 | 143 | 163 | 165 | 165 | 164 | 0.87 | CS | 145 | 147 | 148 | 147 | 159 | 159 | 161 | 160 |
| 28 | 30 | *24+3* | WX | 144 | 149 | 146 | 146 | 158 | 162 | 161 | 160 | 0.91 | CS | 144 | 145 | 144 | 144 | 161 | 165 | 163 | 163 |
| 29 | 33 | *24+6* | WX | 151 | 155 | 153 | 153 | 171 | 172 | 171 | 171 | 0.89 | CS | 152 | 151 | 149 | 151 | 170 | 170 | 170 | 170 |
| 30 | 37 | *24+5* | WX | 149 | 150 | 151 | 150 | 165 | 165 | 165 | 165 | 0.91 | CS | 152 | 152 | 150 | 151 | 170 | 166 | 171 | 169 |
| 31 | 36 | *24+3* | WX | 153 | 149 | 153 | 152 | 175 | 169 | 174 | 172 | 0.88 | CS | 153 | 155 | 146 | 151 | 165 | 166 | 165 | 165 |
| 32 | 36 | *25+0* | WX | 143 | 146 | 141 | 143 | 166 | 165 | 169 | 166 | 0.86 | CS | 146 | 145 | 143 | 145 | 167 | 161 | 162 | 163 |
| 33 | 35 | *24+0* | WX | 140 | 144 | 143 | 142 | 164 | 164 | 167 | 164 | 0.87 | CS | 142 | 143 | 147 | 144 | 157 | 159 | 160 | 159 |
| 34 | 29 | *23+6* | WX | 148 | 147 | 149 | 148 | 162 | 160 | 158 | 161 | 0.92 | CS | 148 | 150 | 148 | 149 | 152 | 157 | 158 | 155 |
| 35 | 28 | *24+2* | WX | 145 | 148 | 147 | 147 | 156 | 159 | 162 | 158 | 0.93 | CS | 148 | 147 | 150 | 148 | 169 | 170 | 168 | 169 |
| 36 | 28 | *24+3* | WX | 145 | 146 | 147 | 146 | 173 | 172 | 172 | 172 | 0.85 | CS | 146 | 150 | 149 | 148 | 173 | 172 | 170 | 172 |
| 37 | 29 | *23+5* | WX | 140 | 142 | 141 | 141 | 176 | 174 | 173 | 175 | 0.81 | CS | 141 | 142 | 142 | 142 | 169 | 168 | 170 | 169 |
| 38 | 27 | *23+5* | WX | 144 | 146 | 144 | 145 | 158 | 163 | 159 | 161 | 0.90 | CS | 146 | 144 | 148 | 146 | 154 | 156 | 153 | 154 |
| 39 | 26 | *25+0* | WX | 153 | 147 | 149 | 150 | 170 | 169 | 164 | 170 | 0.88 | CS | 147 | 148 | 147 | 147 | 168 | 167 | 165 | 167 |
| 40 | 28 | *24+0* | WX | 143 | 146 | 144 | 144 | 160 | 155 | 158 | 157 | 0.92 | CS | 143 | 145 | 144 | 144 | 159 | 163 | 164 | 162 |
| 41 | 29 | *25+0* | WX | 137 | 141 | 140 | 140 | 171 | 171 | 174 | 171 | 0.82 | CS | 140 | 142 | 143 | 142 | 163 | 169 | 165 | 166 |
| 42 | 27 | *25+1* | WX | 149 | 152 | 148 | 150 | 172 | 173 | 169 | 172 | 0.87 | CS | 146 | 150 | 149 | 148 | 168 | 170 | 168 | 169 |
| 43 | 26 | *23+3* | WX | 150 | 147 | 147 | 148 | 161 | 165 | 165 | 163 | 0.91 | CS | 145 | 148 | 146 | 146 | 165 | 162 | 169 | 165 |
| 44 | 29 | *24+5* | WX | 148 | 149 | 149 | 149 | 169 | 166 | 167 | 167 | 0.89 | CS | 143 | 150 | 148 | 147 | 173 | 173 | 172 | 173 |
| 45 | 26 | *24+2* | WX | 147 | 149 | 147 | 148 | 165 | 164 | 164 | 165 | 0.90 | CS | 147 | 154 | 150 | 150 | 161 | 160 | 159 | 160 |
| 46 | 24 | *24+4* | WX | 138 | 143 | 140 | 140 | 166 | 167 | 166 | 167 | 0.84 | CS | 144 | 141 | 146 | 144 | 171 | 171 | 170 | 170 |
| 47 | 23 | *24+1* | WX | 150 | 149 | 152 | 150 | 162 | 163 | 164 | 163 | 0.92 | CS | 152 | 152 | 153 | 153 | 164 | 164 | 165 | 164 |
| 48 | 23 | *24+3* | WX | 156 | 151 | 152 | 153 | 165 | 165 | 167 | 165 | 0.93 | CS | 152 | 149 | 150 | 151 | 163 | 166 | 165 | 165 |
| 49 | 25 | *24+1* | WX | 146 | 147 | 148 | 147 | 160 | 168 | 165 | 164 | 0.90 | CS | 150 | 149 | 148 | 149 | 169 | 171 | 168 | 169 |
| 50 | 25 | *24+5* | WX | 154 | 156 | 156 | 155 | 170 | 170 | 166 | 170 | 0.91 | CS | 155 | 156 | 156 | 156 | 167 | 173 | 169 | 170 |
| 51 | 27 | *24+4* | WX | 144 | 147 | 145 | 145 | 166 | 170 | 165 | 168 | 0.86 | CS | 147 | 148 | 147 | 147 | 167 | 166 | 164 | 166 |
| 52 | 26 | *24+2* | WX | 138 | 141 | 138 | 139 | 158 | 156 | 158 | 157 | 0.89 | CS | 140 | 141 | 138 | 140 | 155 | 155 | 157 | 156 |
| 53 | 28 | *34+4* | WX | 147 | 149 | 151 | 149 | 165 | 162 | 165 | 164 | 0.91 | CS | 144 | 148 | 148 | 147 | 163 | 163 | 163 | 163 |
| 54 | 27 | *23+4* | WX | 146 | 147 | 145 | 146 | 165 | 167 | 158 | 166 | 0.88 | CS | 150 | 149 | 147 | 149 | 169 | 170 | 167 | 169 |
| 55 | 20 | *24+4* | WX | 148 | 150 | 151 | 150 | 171 | 174 | 174 | 172 | 0.87 | CS | 149 | 151 | 150 | 150 | 173 | 171 | 174 | 173 |
| 56 | 36 | *24+6* | WX | 149 | 147 | 145 | 147 | 170 | 168 | 172 | 169 | 0.87 | CS | 141 | 145 | 145 | 144 | 173 | 168 | 168 | 170 |
| 57 | 35 | *25+0* | WX | 156 | 154 | 153 | 154 | 168 | 168 | 166 | 168 | 0.92 | CS | 150 | 153 | 150 | 151 | 176 | 173 | 173 | 174 |
| 58 | 32 | *24+3* | WX | 148 | 150 | 146 | 148 | 162 | 164 | 161 | 163 | 0.91 | CS | 144 | 149 | 148 | 147 | 158 | 157 | 160 | 158 |
| 59 | 33 | *24+3* | WX | 144 | 142 | 146 | 144 | 162 | 160 | 158 | 161 | 0.89 | CS | 138 | 141 | 143 | 141 | 161 | 163 | 164 | 163 |
| 60 | 34 | *24+3* | WX | 149 | 150 | 148 | 149 | 171 | 169 | 173 | 170 | 0.88 | CS | 150 | 151 | 149 | 150 | 171 | 168 | 171 | 170 |
| 61 | 27 | *23+4* | WX | 145 | 142 | 143 | 143 | 158 | 161 | 160 | 160 | 0.89 | CS | 141 | 140 | 143 | 141 | 157 | 156 | 159 | 157 |
| 62 | 29 | *24+0* | WX | 141 | 143 | 141 | 142 | 168 | 168 | 164 | 168 | 0.85 | CS | 137 | 141 | 143 | 140 | 168 | 166 | 165 | 167 |
| 63 | 25 | *24+4* | WX | 136 | 143 | 139 | 139 | 161 | 161 | 164 | 161 | 0.86 | CS | 140 | 143 | 140 | 141 | 153 | 150 | 153 | 152 |
| 64 | 27 | *24+4* | WX | 151 | 153 | 154 | 153 | 169 | 167 | 165 | 168 | 0.91 | CS | 152 | 152 | 151 | 152 | 168 | 166 | 169 | 168 |
| 65 | 25 | *23+6* | WX | 145 | 146 | 144 | 145 | 157 | 158 | 158 | 158 | 0.92 | CS | 146 | 145 | 144 | 145 | 158 | 157 | 159 | 158 |
| 66 | 26 | *24+2* | WX | 147 | 145 | 148 | 147 | 165 | 162 | 165 | 164 | 0.90 | CS | 148 | 150 | 150 | 149 | 164 | 165 | 165 | 165 |
| 67 | 25 | *24+4* | WX | 147 | 143 | 144 | 145 | 172 | 171 | 173 | 172 | 0.84 | CS | 145 | 146 | 146 | 146 | 175 | 172 | 171 | 173 |
| 68 | 27 | *25+1* | WX | 143 | 146 | 148 | 146 | 158 | 160 | 161 | 159 | 0.92 | CS | 143 | 145 | 145 | 144 | 166 | 169 | 163 | 166 |
| 69 | 27 | *24+2* | WX | 149 | 146 | 148 | 148 | 172 | 165 | 168 | 169 | 0.88 | CS | 148 | 149 | 148 | 148 | 164 | 163 | 163 | 163 |
| 70 | 26 | *24+0* | WX | 149 | 147 | 148 | 148 | 174 | 176 | 176 | 175 | 0.85 | CS | 149 | 148 | 146 | 148 | 174 | 172 | 175 | 174 |
| 71 | 29 | *24+5* | WX | 145 | 146 | 143 | 145 | 159 | 158 | 160 | 159 | 0.91 | CS | 145 | 146 | 146 | 146 | 165 | 160 | 163 | 163 |
| 72 | 27 | *23+6* | WX | 149 | 146 | 145 | 147 | 159 | 157 | 161 | 158 | 0.93 | CS | 147 | 146 | 147 | 147 | 158 | 159 | 160 | 159 |
| 73 | 26 | *24+2* | WX | 143 | 145 | 142 | 143 | 168 | 169 | 170 | 169 | 0.85 | CS | 143 | 146 | 145 | 145 | 159 | 161 | 159 | 160 |
| 74 | 28 | *24+2* | WX | 142 | 143 | 140 | 142 | 167 | 168 | 160 | 168 | 0.85 | CS | 140 | 143 | 141 | 141 | 173 | 171 | 170 | 171 |
| 75 | 29 | *24+5* | WX | 151 | 149 | 153 | 151 | 174 | 176 | 173 | 175 | 0.86 | CS | 149 | 150 | 150 | 150 | 163 | 170 | 167 | 167 |
| 76 | 30 | *24+3* | WX | 138 | 141 | 139 | 139 | 162 | 162 | 161 | 162 | 0.86 | CS | 138 | 141 | 140 | 140 | 162 | 162 | 161 | 162 |
| 77 | 29 | *24+2* | WX | 154 | 153 | 158 | 155 | 171 | 169 | 172 | 170 | 0.91 | CS | 154 | 154 | 156 | 155 | 164 | 166 | 164 | 164 |
| 78 | 28 | *24+2* | WX | 147 | 146 | 147 | 147 | 173 | 174 | 175 | 174 | 0.84 | CS | 146 | 146 | 147 | 146 | 170 | 171 | 172 | 171 |
| 79 | 28 | *24+3* | WX | 149 | 146 | 147 | 147 | 176 | 173 | 174 | 175 | 0.84 | CS | 147 | 147 | 145 | 146 | 175 | 176 | 173 | 175 |
| 80 | 27 | *24+0* | WX | 147 | 146 | 150 | 148 | 164 | 165 | 159 | 165 | 0.90 | CS | 148 | 150 | 149 | 149 | 169 | 166 | 163 | 166 |
| 81 | 28 | *24+2* | WX | 150 | 148 | 146 | 148 | 171 | 173 | 170 | 172 | 0.86 | CS | 151 | 150 | 151 | 151 | 174 | 176 | 174 | 175 |
| 82 | 27 | *24+6* | WX | 147 | 146 | 144 | 146 | 169 | 170 | 168 | 170 | 0.86 | CS | 146 | 144 | 147 | 146 | 172 | 174 | 172 | 173 |
| 83 | 22 | *24+6* | WX | 150 | 149 | 152 | 150 | 171 | 173 | 172 | 172 | 0.87 | CS | 151 | 149 | 153 | 151 | 174 | 171 | 173 | 173 |
| 84 | 26 | *24+2* | WX | 149 | 145 | 147 | 147 | 175 | 171 | 176 | 173 | 0.85 | CS | 148 | 150 | 151 | 150 | 166 | 165 | 168 | 166 |
| 85 | 29 | *24+3* | WX | 148 | 146 | 147 | 147 | 167 | 166 | 167 | 167 | 0.88 | CS | 147 | 150 | 150 | 149 | 176 | 173 | 169 | 173 |
| 86 | 23 | *24+2* | WX | 144 | 148 | 145 | 146 | 176 | 178 | 171 | 177 | 0.82 | CS | 145 | 147 | 145 | 146 | 172 | 173 | 175 | 173 |
| 87 | 22 | *24+2* | WX | 156 | 153 | 154 | 154 | 169 | 174 | 172 | 172 | 0.90 | CS | 154 | 155 | 156 | 155 | 166 | 168 | 169 | 168 |
| 88 | 21 | *23+6* | WX | 136 | 139 | 137 | 137 | 169 | 166 | 170 | 168 | 0.82 | CS | 137 | 136 | 137 | 137 | 173 | 174 | 171 | 173 |
| 89 | 26 | *24+2* | WX | 141 | 145 | 140 | 142 | 176 | 177 | 176 | 177 | 0.80 | CS | 143 | 145 | 143 | 144 | 172 | 170 | 173 | 172 |
| 90 | 28 | *23+3* | WX | 145 | 142 | 141 | 143 | 163 | 162 | 163 | 163 | 0.88 | CS | 139 | 142 | 141 | 141 | 166 | 167 | 161 | 164 |
| 91 | 27 | *24+3* | WX | 144 | 146 | 143 | 144 | 173 | 170 | 171 | 172 | 0.84 | CS | 142 | 143 | 141 | 142 | 168 | 170 | 171 | 170 |
| 92 | 29 | *25+1* | WX | 146 | 143 | 144 | 144 | 174 | 178 | 176 | 176 | 0.82 | CS | 147 | 146 | 149 | 147 | 173 | 175 | 173 | 174 |
| 93 | 30 | *24+0* | WX | 149 | 153 | 155 | 152 | 168 | 170 | 177 | 169 | 0.90 | CS | 151 | 152 | 154 | 152 | 171 | 173 | 172 | 172 |
| 94 | 33 | *25+6* | WX | 141 | 147 | 144 | 144 | 171 | 167 | 176 | 169 | 0.85 | CS | 146 | 144 | 147 | 146 | 177 | 170 | 171 | 173 |
| 95 | 32 | *24+2* | WX | 145 | 146 | 147 | 146 | 169 | 168 | 168 | 169 | 0.86 | CS | 146 | 149 | 147 | 147 | 169 | 171 | 172 | 171 |
| 96 | 35 | *23+5* | WX | 147 | 141 | 142 | 143 | 168 | 173 | 173 | 171 | 0.84 | CS | 143 | 143 | 144 | 143 | 168 | 163 | 170 | 167 |
| 97 | 31 | *25+4* | WX | 142 | 146 | 144 | 144 | 172 | 174 | 171 | 173 | 0.83 | CS | 145 | 145 | 148 | 146 | 166 | 168 | 169 | 168 |
| 98 | 32 | *25+2* | WX | 147 | 146 | 145 | 146 | 162 | 162 | 158 | 162 | 0.90 | CS | 148 | 148 | 149 | 148 | 159 | 160 | 161 | 160 |
| 99 | 36 | *24+2* | WX | 142 | 145 | 144 | 144 | 162 | 166 | 163 | 164 | 0.88 | CS | 144 | 143 | 147 | 145 | 165 | 166 | 169 | 167 |
| 100 | 36 | *23+6* | WX | 147 | 141 | 144 | 144 | 170 | 172 | 168 | 171 | 0.84 | CS | 141 | 144 | 145 | 143 | 169 | 170 | 171 | 170 |
| 101 | 34 | *24+3* | WX | 142 | 146 | 146 | 145 | 173 | 171 | 175 | 172 | 0.84 | CS | 148 | 145 | 146 | 146 | 169 | 171 | 171 | 171 |
| 102 | 38 | *24+2* | WX | 145 | 146 | 143 | 145 | 179 | 170 | 174 | 175 | 0.83 | CS | 146 | 145 | 144 | 145 | 177 | 173 | 176 | 175 |
| 103 | 29 | *24+6* | WX | 151 | 146 | 147 | 148 | 169 | 168 | 168 | 169 | 0.88 | CS | 147 | 147 | 148 | 147 | 170 | 171 | 169 | 170 |
| 104 | 20 | *24+1* | WX | 146 | 143 | 148 | 146 | 174 | 172 | 171 | 173 | 0.84 | CS | 145 | 146 | 148 | 146 | 170 | 171 | 172 | 171 |
| 105 | 21 | *23+4* | WX | 137 | 141 | 139 | 139 | 173 | 176 | 176 | 175 | 0.79 | CS | 137 | 140 | 137 | 138 | 170 | 171 | 170 | 170 |
| 106 | 19 | *23+2* | WX | 142 | 146 | 143 | 143 | 175 | 172 | 175 | 174 | 0.82 | CS | 144 | 141 | 147 | 144 | 173 | 172 | 170 | 172 |
| 107 | 28 | *24+0* | WX | 157 | 152 | 155 | 155 | 175 | 176 | 163 | 176 | 0.88 | CS | 156 | 154 | 158 | 156 | 169 | 172 | 171 | 171 |
| 108 | 26 | *26+6* | WX | 143 | 147 | 145 | 145 | 167 | 168 | 168 | 168 | 0.86 | CS | 143 | 145 | 146 | 145 | 171 | 170 | 169 | 170 |
| 109 | 25 | *26+5* | WX | 147 | 146 | 144 | 146 | 160 | 163 | 168 | 162 | 0.90 | CS | 147 | 149 | 145 | 147 | 166 | 166 | 164 | 165 |
| 110 | 24 | *27+2* | WX | 152 | 146 | 146 | 148 | 171 | 171 | 170 | 171 | 0.87 | CS | 143 | 146 | 144 | 144 | 169 | 168 | 170 | 169 |
